# Supplementary material for: Effect of Metabolic Syndrome and Individual Components on Colon Cancer Characteristics and Prognosis
Source: PubMed Central journal article supplement (PMC7970759; doi:10.3389/fonc.2021.631257), 2021-03-04
Supplement: DataSheet_1.pdf [file DataSheet_1.pdf]

## *Supplementary Material*

**Supplementary Table 1 - AJCC classification according to metabolic syndrome status**

|                            | <b>All patients (n=168)</b> | <b>No MS (n=83)</b> | <b>MS (n=85)</b> | <b>p value</b> |
|----------------------------|-----------------------------|---------------------|------------------|----------------|
| AJCC Classification, n (%) |                             |                     |                  | 0.285          |
| I                          | 36 (21.4)                   | 11 (13.3)           | 25 (29.4)        |                |
| IIa                        | 41 (24.4)                   | 25 (30.1)           | 16 (18.8)        |                |
| IIb                        | 4 (2.4)                     | 2 (2.4)             | 2 (2.4)          |                |
| IIc                        | 3 (1.8)                     | 1 (1.2)             | 2 (2.4)          |                |
| IIIa                       | 5 (3.0)                     | 2 (2.4)             | 3 (3.5)          |                |
| IIIb                       | 39 (23.2)                   | 21 (25.3)           | 18 (21.2)        |                |
| IIIc                       | 8 (4.8)                     | 5 (6.0)             | 3 (3.5)          |                |
| IVa                        | 17 (10.1)                   | 10 (12.0)           | 7 (8.2)          |                |
| IVb                        | 15 (8.9)                    | 6 (7.2)             | 9 (10.6)         |                |

AJCC – American Joint Committee on Cancer; MS – Metabolic syndrome

**Supplementary Table 2 - Characteristics of propensity-score matched patients before and after matching**

|                               | Before matching |               |         | After matching |               |         |
|-------------------------------|-----------------|---------------|---------|----------------|---------------|---------|
|                               | No MS (n=83)    | MS (n=85)     | p value | No MS (n=60)   | MS (n=60)     | p value |
| Age (years), mean (SD)        | 67 (14)         | 74 (9)        | <0.001  | 72 (12)        | 72 (9)        | 1.000   |
| Tumor size (cm), median (IQR) | 4.5 (3.5-5.5)   | 4.0 (3.0-5.0) | 0.006   | 4.1 (3.5-5.5)  | 4.0 (3.0-5.5) | 0.348   |
| T stage, n (%)                |                 |               |         |                |               |         |
| 1/2                           | 12 (14.5)       | 30 (35.3)     | 0.002   | 11 (18.3)      | 13 (21.7)     | 0.648   |
| 3/4                           | 71 (85.5)       | 55 (64.7)     |         | 49 (81.7)      | 47 (78.3)     |         |
| N stage, n (%)                |                 |               |         |                |               |         |
| 0                             | 48 (57.8)       | 54 (63.5)     | 0.185   | 34 (56.7)      | 36 (60.0)     | 0.870   |
| 1                             | 19 (22.9)       | 23 (27.1)     |         | 16 (26.7)      | 16 (26.7)     |         |
| 2                             | 16 (19.3)       | 8 (9.4)       |         | 10 (16.7)      | 8 (13.3)      |         |
| M stage, n (%)                |                 |               |         |                |               |         |
| 0                             | 66 (79.5)       | 69 (81.2)     | 0.787   | 46 (76.7)      | 49 (81.7)     | 0.500   |
| 1                             | 17 (20.5)       | 16 (18.8)     |         | 14 (23.3)      | 11 (18.3)     |         |

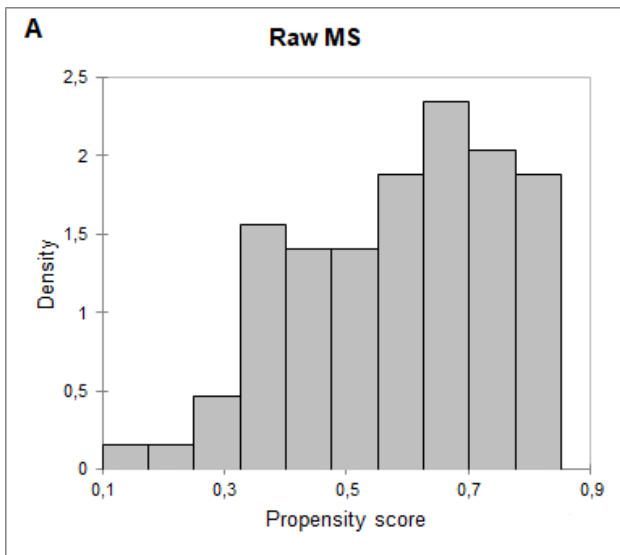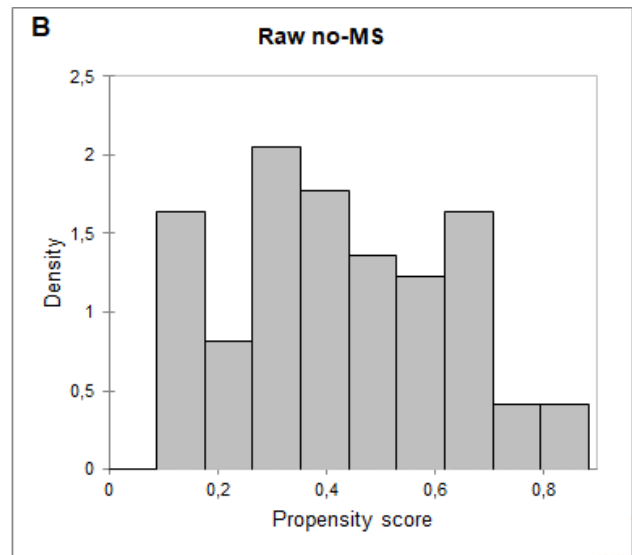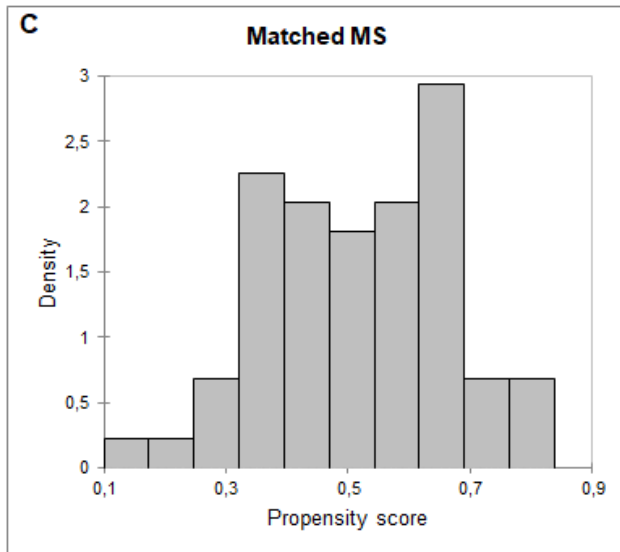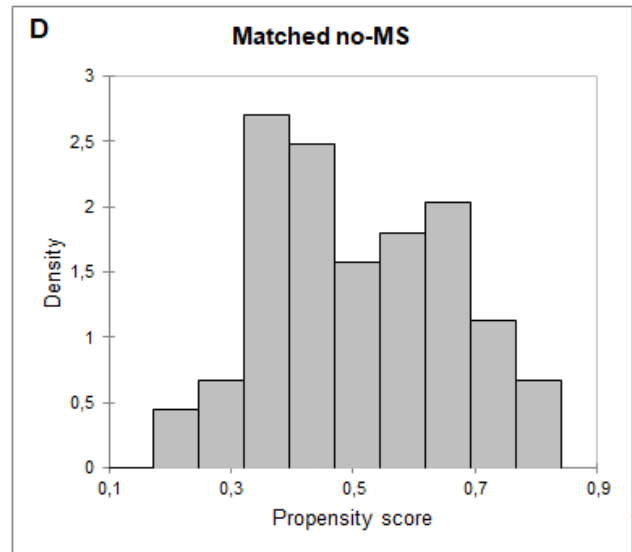

**Supplementary Figure 1 - Histograms of propensity scores before and after matching**
